## 1 Is it time to change the reference genome?

2 Sara Ballouz, Alexander Dobin, Jesse Gillis

### 3 Affiliations:

4 The Stanley Institute for Cognitive Genomics, Cold Spring Harbor Laboratory, Cold Spring Harbor, NY,  
5 11724, USA;

6 Corresponding author: Dr Jesse Gillis, The Stanley Institute for Cognitive Genomics, Cold Spring Harbor  
7 Laboratory, Cold Spring Harbor, NY, 11724, USA

### 8 Abstract

9 The use of the human reference genome has shaped methods and data across modern genomics. This  
10 has offered many benefits while creating a few constraints. In the following piece, we outline the  
11 history, properties, and pitfalls of the current human reference genome. In a few illustrative analyses,  
12 we focus on its use for variant-calling, highlighting its nearness to a “type specimen”. We suggest that  
13 switching to a consensus reference offers important advantages over the current reference with few  
14 disadvantages.

### 15 Keywords

16 Reference genome, consensus genomes, genetic diversity

### 17 Why do we need references?

18 A block of platinum-iridium alloy sits in the International Bureau of Weights and Measures in France.  
19 Until May 20<sup>th</sup>, 2019, it will have a mass of precisely 1 kg. From then on, the kilogram (Le Grand K) will  
20 be defined in reference to Planck’s constant ( $6.626070150 \times 10^{-34}$  kg·m<sup>2</sup>/s [1]) and this will not change  
21 for the foreseeable future. The human genomic location of the tumor protein p53 is chromosome 17:  
22 7,666,487 - 7,689,465 (genome reference GRCh38.p12). How permanent is the reference that  
23 determines this? We will never define the genome in terms of universal constants but can we do better  
24 than our current idiosyncratic choice?

## 1 Frame of reference

2 We need standards to communicate in a common frame of reference, but not all standards are created  
3 equal. When the block of platinum-iridium loses a few atoms, the mass of all other objects change. It  
4 has always been clear that we would like to do better; the kilogram was the last SI unit still defined by a  
5 physical object. A reference defined with respect to a universal constant is not just more consistent, but  
6 also more accessible and practical. An idiosyncratic reference is, on the other hand, not very precisely  
7 shareable. Few people have access to the reference mass (there are six copies [2, 3]) and it is challenging  
8 to replicate (each has uniquely lost and gained atoms). While a universal reference is the ideal, there are  
9 tradeoffs between utility, universality and practicality that must be considered.

## 10 The burden of success

11 What would an “ideal” reference genome look like? Because standards can take many forms, picking  
12 one is non-trivial. In practice, references can be a single sample or type, an average form or an empirical  
13 sampling, or a (universal) gold-standard. A major intent behind the original sequencing of the human  
14 genome was to provide a reference for future analysis and this has been wildly successful. The current  
15 reference genome works primarily as the backbone for all genomic data and databases. It provides a  
16 scaffold for genome assembly, variant calling, \*-seq alignment, gene annotation and functional analysis.  
17 Genes are referred to by their loci, with their base positions defined by reference genome coordinates.  
18 Variants and alleles are labelled as such when compared to the reference (i.e., reference vs alternative).  
19 Diploid and personal genomes are assembled using the reference as a scaffold, and RNA-seq reads are  
20 typically mapped to the reference genome.  
21 These successes make the reference genome an essential resource in many research efforts. However, a  
22 few problems have arisen:

1 1) The reference genome is idiosyncratic. The data and assembly which resulted in the reference reflect  
2 a highly specific process operating on highly specific samples. There could be real anomalies in the  
3 reference and it would be hard to know.

4 2) The reference genome is frequently confused with a healthy baseline. Experts likely know better, but  
5 it is still quite common to hear even genetics researchers refer to “errors in the reference” when they  
6 simply mean that the reference contains a minor allele. The tendency for this confusion to occur reflects  
7 a failed expectation for what a useful reference genome should look like.

8 3) The reference genome is hard to re-evaluate. Using a reference of any type imposes some costs and  
9 some benefits. Different choices will be useful in different circumstances but these are very hard to  
10 establish when the choice of reference is largely arbitrary. If we pick a reference in a principled way,  
11 then those principles can also tell us when we should not pick the reference for our analyses.

12 In the following, we briefly address these three points by outlining the history of the human reference  
13 genome, demonstrating some of its important properties, and describing its utility in a variety of  
14 research ecosystems. Finally, we suggest a route toward its improvement through the use of a  
15 consensus genome.

## 16 [The reference genome is idiosyncratic](#)

### 17 [The history of the human reference genome](#)

18 It is commonly said that we now live in the age of ‘Big Data’. In genomics, this refers to the hundreds of  
19 thousands of a genomes sequenced from across all domains of life (among grander plans [4]). The  
20 number of base pairs deposited in databases dedicated to sequencing data alone is at peta scale (e.g.,  
21 Short Read Archive stands at  $\sim 2 \times 10^{16}$  bp). This all started humbly enough with advent of Sanger  
22 sequencing in 1977. With the ability to read out the genome at base pair resolution, researchers were  
23 able to access the genetic code of bacteriophages and their favorite genes. Why sequence the full

1 human genome, or any genome for that matter? The first reason was the desire for “Big Science” for  
2 biology [5]. Large projects existed in other fields such as physics, so why not biology? If other species  
3 were being sequenced, then why not humans? Of course there were more pragmatic reasons for the  
4 suggestion. In addition to demonstrating technological feasibility, genome-scale science would enable  
5 comprehensive investigation of genetic differences both within and across species [6, 7]. Additionally,  
6 sequencing an entire genome would allow for the identification of all genes in a given species, and not  
7 only those that were the target of a monogenic disease (e.g., *HTT* in Huntington’s disease [8]) or of  
8 interest to a field (e.g., *P53* in cancer [9]). The sequences of genomes would serve as useful toolboxes  
9 for probing unknown genomic regions, allowing for functional annotation of genes, the discovery of  
10 regulatory regions and potentially novel functional sequences. With these various desires in mind, the  
11 Human Genome Project was conceived [10].

12 The Human Genome Project was a gargantuan effort for its time, costing close to 3 billion US dollars on  
13 its completion. The first draft genome was published in 2001 [11], along with the competitive project  
14 from Celera [12]. The “complete” genome was announced in 2003, meaning 99% of the euchromatic  
15 sequence, with multiple gaps in the assembly [13]. Along with launching the field of human genomics,  
16 the project also prompted the development of many of the principles behind public genomic data  
17 sharing through the Bermuda Principles, ensuring the reference genome was a public resource [14]. As a  
18 direct consequence, the use and improvement of the reference has made genomics a rapidly growing  
19 and evolving field. The first major discovery was the scale at which the human genome was littered with  
20 repetitive elements, making both sequencing hard and the assembly of the sequenced reads a  
21 computationally challenging problem [15]. In time, single-molecule technologies generating longer reads  
22 [16-18] and algorithmic advancements [19-21] have been able to significantly improve the reference.  
23 Currently, the human genome is at version 38 (GRCh38 [22]), with less than 1000 reported gaps [23,  
24 24].

## 1 The reference genome is not a baseline

### 2 The current reference genome is a type specimen

3 Although the reference genome is meant to be a standard, what that means in a practical sense is not  
4 clearly defined. For example, the allelic diversity within the reference genome is not an average of the  
5 global population (or any population), but rather contains long stretches highly specific to one  
6 individual. Of the 20 donors the reference was meant to sample from, 70% of the sequence was  
7 obtained from a single sample, 'RPC-11', who had a high risk for diabetes [25]. After the sequencing of  
8 the first personal genomes in 2007 [26, 27], the differences between genomes suggested the reference  
9 could not easily serve as a universal "background" genome. This observation is easily extended to other  
10 populations [28-31], where higher diversity can be observed. The HapMap project [32, 33] and the  
11 subsequent 1000 Genomes Project [34] were a partial consequence of the need to sample broader  
12 population variability [35]. Although the first major efforts to improve the reference focused on the  
13 need to fill in gaps (with other genomes), work is now shifting to incorporate diversity through the  
14 addition of alternate loci scaffolds and haplotype sequences [36]. But just how similar to a personal  
15 genome is the current reference? We performed a short series of analyses to test this (see **Figure 1**),  
16 using the 1000 Genomes Project samples. Starting off with allele frequencies (AF) of known variants,  
17 around 2 million reference alleles have population frequencies less than 0.5, indicating that they are the  
18 minor allele (dark blue line in **Figure 1A**). Of the total number of variants and base pairs assessed, this  
19 might seem high for a reference. In fact, the allelic distribution of the current reference is almost  
20 identical to the allelic distributions of personal genomes sampled from the 1000 Genomes Project (light  
21 blue lines in **Figure 1B**). The current reference is a well-defined (and well-assembled) personal genome.  
22 As such, it is a good type specimen, displaying properties of many personal genomes. However, this  
23 means it does not represent a default any more than any other arbitrarily chosen personal genome  
24 would.

## 1 Reference bias

2 Because the reference genome is close to being a type specimen, it can distort results where it is not  
3 very typical. In alignment, reference bias refers to the tendency for some reads or sequences to map  
4 more readily to the reference alleles, while reads with non-reference alleles may not be mapped or  
5 mapped at lower rates. For allele specific expression, eQTL analysis, and other RNA-seq based  
6 quantifications, the impact of this is uncertain [37-40]. In variant calling, this reference bias can be more  
7 important. Alignment to the reference to infer variation related to disease is still a step in most analyses,  
8 and crucial in clinical assignments of variant significance and interpretation [41, 42]. In these cases,  
9 reference bias will induce particular error. Variant callers can call more “variants” when the reference  
10 alleles are rare, or fail to call variants when they are rare yet also shared by the reference [43-46]. Due  
11 to the presence of rare alleles, some known pathogenic variants are easily ignored as benign [25]. A  
12 variant called with respect to the reference genome will be biased, reflecting properties of the reference  
13 genome rather than broadly shared population properties. Indeed, continuing with our analysis (**Figure**  
14 **1B**), if we compare the variant calls within personal genomes against the reference, we find that close to  
15  $\sim\frac{2}{3}$  of the homozygous variants (blue lines) and  $\frac{1}{3}$  of the heterozygous variants (green lines) actually  
16 have allele frequencies above 0.5. Variants with respect to the reference are quite likely to mean it is  
17 the reference which has the “variant” with respect to any default expectation, particularly if it is  
18 homozygous.

19

20

21

22

23

24

25

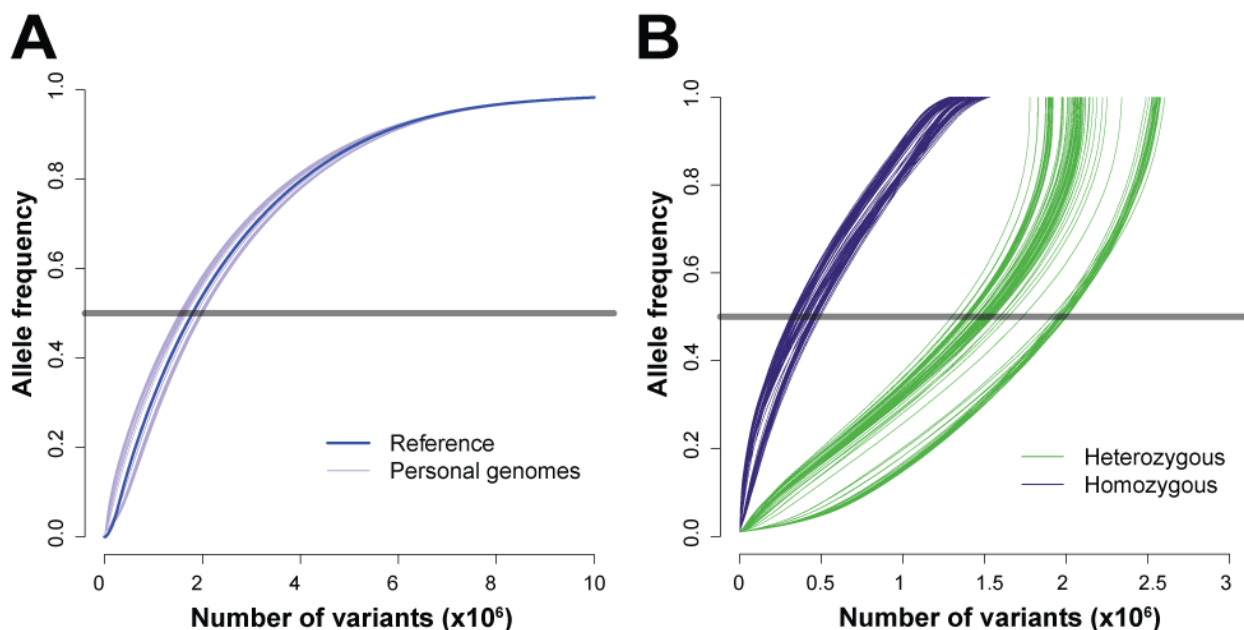

1  
2 **Figure 1 The reference genome is a type specimen** (A) Distribution of variants in the reference genome and those  
3 of personal/individual genomes. Collapsing diploid whole-genomes genotyped from the 1000 Genomes Project  
4 into haploid genomes, we can observe just how similar the reference is to an individual genome. First, taking  
5 population allele frequencies from a random sample of 100 individual genomes, we generated new haploid  
6 “reference” sequences. We replaced the alleles of the reference genome with the personal homozygous variant,  
7 and a randomly chosen one of the heterozygous alleles. For simplicity, all calculations are done against the  
8 autosomal chromosomes of the GRCh37 assembly and includes only single nucleotide bi-allelic (i.e., only 2 alleles  
9 per SNP) variants. (B) Distribution of allele frequencies for variants called in 100 randomly chosen personal  
10 genomes, computed against the reference genome. Here, variants with respect to the reference are quite likely to  
11 mean it is the reference which has the “variant” with respect to any default expectation, particularly if it is  
12 homozygous.

13 **The reference genome is hard to re-evaluate**

14 **Type references are often good enough**

15 A research ecosystem has grown up around the reference and has mostly taken advantage of its virtues  
16 while compensating for its flaws. In alignment for example, this has included the use of masked,

1 enhanced, or diploid references. Masking repetitive regions or rare variants is a partial solution for  
2 improving mapping and assembly of short reads. Enhanced and diploid genomes involve inserting  
3 additional alleles or sequences into the current reference [45-53] which helps remove reference bias.  
4 And as the reference genome is a collapsed diploid, work on purely homozygous genomes (termed  
5 platinum references) will provide true haploid genomes (such as one from a molar pregnancy like the  
6 CHM1 cell line [54, 55]). More long term fixes are to generate new independent alternate references,  
7 eliminating the particularity of the original sample choices made such as those proposed by the MGI  
8 Reference Genome Improvement project [56]. The goal there is to amend the lack of diversity of the  
9 reference by creating gold genomes: gold-standard references each specific for an individual population.  
10 Along with latter being used as new standard genomes, personal or personalized genomes will become  
11 more common in clinical settings, with one's own genome (potentially from birth), being used across  
12 one's life for diagnostic assessments. However, the improvements all still use the reference genome as  
13 a foundation, in one form or another.

#### 14 [Change is tricky](#)

15 The pan-genome, a collection of multiple genomes from the same species, has been suggested to  
16 replace a single reference [57]. More complex than a single haploid reference sequence, it contains all  
17 possible DNA sequences which may be missing from any one individual [58]. A pan-genome can be  
18 represented linearly as concatenated alternate scaffolds, or as a directed graph [59], where alternate  
19 paths stand in for both structural and single variants [60]. These are particularly useful for plants where  
20 ploidy within a species exists [61], or in bacteria where different strains have lost or gained genes [62].  
21 Adopting the graph genome as a reference reflects not just the inclusion of additional data, but is also a  
22 novel data structure and format. While well defined, it is non-trivial to incorporate into existing research  
23 practice and tools are under active development [63, 64]. A human pan-genome may improve variant  
24 calling by virtue of containing more variation [65], but this is offset by being a hard reference to refer to;



1 unlike a linear reference genome, the coordinates in a pan-genome are harder to represent statically  
2 [66]. This is an issue as the current reference genome is the backbone of all genomics data. Variant  
3 databases use the reference's coordinate systems, as do most gene and transcript annotations. Genome  
4 browsers use linear tracks of genomic data, and graph visualizations are unlikely to be interpretable  
5 (e.g., cactus graphs [67]). While graph genomes have many properties to recommend them, they will  
6 come at some cost and obtaining buy-in may be particularly challenging.

## 7 Seeking consensus

### 8 Why a consensus?

9 Instead of completely discarding the current reference or jumping to new graph genomes, we suggest  
10 an intuitive improvement – a consensus genome. In the same way that consensus sequences of  
11 transcription factor binding motifs represent the most common version of the motif, a consensus  
12 genome represents the most common alleles and variants of a population. A consensus genome is  
13 comparatively painless to existing research practice, looking substantially like a new reference in the  
14 current mode, but reflecting real improvements in interpretation and generalizability to new uses. In its  
15 very nature a consensus genome addresses the three concerns we have with the current reference: it is  
16 easy to replicate and is accessible, it is empirical and thus a baseline and is easily open to novel  
17 evaluation and adjustment to suit different baselines (e.g., populations).

### 18 What would a consensus genome look like?

19 In the simplest of cases, a consensus genome remains a haploid linear reference, where each base pair  
20 represents the most commonly observed allele in a population. As a parallel to our assessment in the  
21 previous section, we show this by looking at the variants called for the personal genomes sampled from  
22 the 1000 Genomes Project (**Figure 2**). For illustrative purposes, we constructed a consensus genome by  
23 replacing all alleles with their major allele (**Figure 2A**), as measured in the 1000 Genomes Project

1 dataset. Repeating the previous analysis, firstly we note the distribution of alleles are all above 0.5 as  
2 designed (**Figure 2B**). Secondly, the personal variants called are all below the population frequencies of  
3 0.5 as expected and we see that the total number of variants called has been significantly reduced  
4 (**Figure 2C**). Importantly, the number of homozygous variants called when using the consensus rather  
5 than the current reference is reduced from ~1.5M to ~0.5M. The distribution of the number of  
6 homozygous variants in all personal genomes in the 1000 Genomes Project collection against the  
7 standard reference (blue line) and consensus reference (red line) has markedly shifted (**Figure 2D**).

8 Additionally, the reference genome can be far from the average not just randomly (minor alleles) but  
9 also systematically, reflecting variation drawn from a particular population. A recent pan-assembly of  
10 African genomes directly spoke to the necessity for population specific references, as approximately  
11 10% of DNA sequence (~300Mbp) was “missing” from the GRCh38 reference [68]. Indigenous and minor  
12 populations are understudied in general, which will need to be remedied in order to provide adequate  
13 clinical and medical care [69]. For example, certain drugs will be more effective and safer in some  
14 populations over others due to variants and how they change drug metabolism. To expand on this and  
15 test for population-specific impacts, we now build population-specific consensus genomes using allele  
16 frequencies of the five major populations represented in the 1000 Genomes Project data. Population-  
17 specific consensus genomes display a modest reduction in the number of homozygous variants called  
18 (darker red lines in **Figure 2D**), and a tightening of the spread of the distribution, as would be expected  
19 of a more refined null. This suggests the modal peaks are population specific variants, and use of  
20 population typical data is a boon.

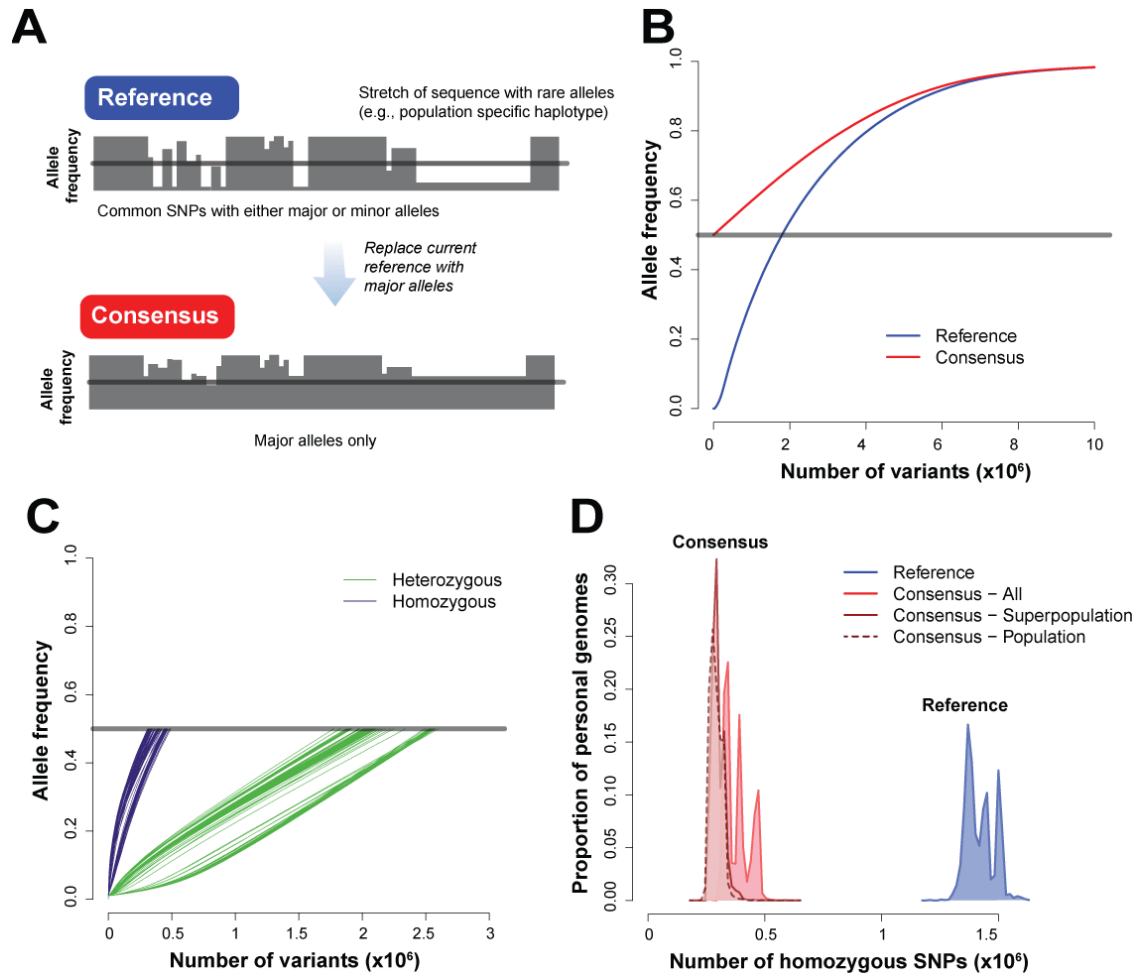

1

2 **Figure 2 How consensus alleles improve the interpretability of the reference** (A) To build a consensus genome,

3 we replace minor alleles within the current reference with their major alleles (AF>0.5) across all bi-allelic SNPs. (B)

4 Distribution of variants in consensus (red line) and the current reference (blue line). (C) Distribution of allele

5 frequencies for variants in 100 randomly chosen personal genomes, computed against a consensus genome. (D)

6 Distribution of the number of homozygous SNVs in 2504 personal genomes, computed against the reference,

7 against all-human consensus, mean of super-population consensus and mean of population consensus. The

8 consensus reference for each of the 5 super-populations leads to additional reduction in the number of

9 homozygous variants in the personal genomes in each super-population (dark red curve). Further breakdown into

10 the 26 representative populations does not dramatically reduce the number of homozygous variants (dashed red

11 line).

1    What would research built around a consensus genome look like?

2    In the above, our “consensus” uses both the existing reference and our knowledge of population allele  
3    frequencies. While this is particularly straightforward for SNPs, more complex genomic rearrangements  
4    can also be iteratively incorporated into a consensus genome. Practically speaking, any novel variant is  
5    called with respect to an existing reference and once that variant is known to be common, it becomes  
6    part of the new consensus. The distribution of population frequencies for variants means that relatively  
7    few genomes are necessary to ascertain that a novel variant is the majority allele. This makes the  
8    iterative improvement of the reference a more community-based effort, and one which can be tailored  
9    to suit different purposes. We think explicit choices of alternative references, particularly population-  
10   specific ones, will be a natural extension of the framework we describe (**Figure 3**). Switching to a  
11   consensus genome is not a transformational change to current practice and is far from a perfect  
12   standard, but by offering incremental, broad-based, and progressive improvement, we believe it is a  
13   timely step to take.

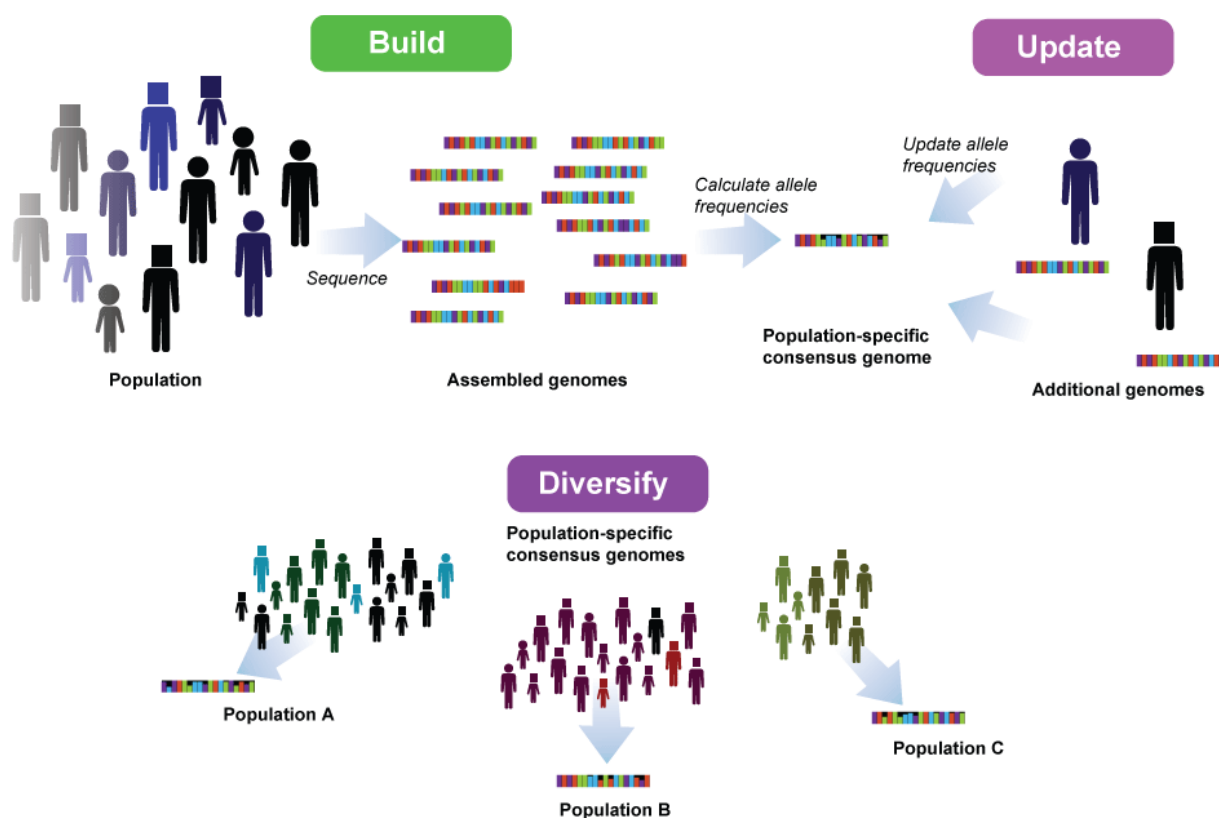

1  
2 **Figure 3 How-to reference.** For future or new populations, sequencing is followed by building the consensus  
3 sequence from those genomes. Any new genomes will only adjust and improve on the current consensus based on  
4 change of allele frequencies. Finally, the reference can be replicated and diversified into other population-specific  
5 references.

6 [List of abbreviations](#)

7 AF: allele frequency

8 [Declarations](#)

9 [Ethics approval and consent to participate](#)

10 Not applicable

11 [Consent for publication](#)

12 Not applicable

## 1 Competing interests

2 The authors declare that they have no competing interests.

## 3 Funding

4 Research reported in this publication was supported by the National Institutes of Health R01HG009318  
5 to A.D., R01LM012736 and R01MH113005 to J.A.G.

## 6 Authors' contributions

7 AD ran the analyses. AD and JAG conceived the manuscript. SB, AD, and JAG wrote the manuscript. All  
8 authors read and approved the final manuscript.

## 9 Acknowledgements

10 The authors would like to thank Megan Crow and Stephan Fischer for insightful comments and feedback  
11 on the manuscript.

## 12 References

- 13 1. **Kilogram: Mass and Planck's Constant** [[https://www.nist.gov/si-redefinition/kilogram-mass-](https://www.nist.gov/si-redefinition/kilogram-mass-and-plancks-constant)  
14 [and-plancks-constant](https://www.nist.gov/si-redefinition/kilogram-mass-and-plancks-constant)]
- 15 2. Richard D: **The SI unit of mass.** *Metrologia* 2003, **40**:299.
- 16 3. **International Prototype of the Kilogram** [<https://www.bipm.org/en/bipm/mass/ipk/>]
- 17 4. Lewin HA, Robinson GE, Kress WJ, Baker WJ, Coddington J, Crandall KA, Durbin R, Edwards SV,  
18 Forest F, Gilbert MTP, et al: **Earth BioGenome Project: Sequencing life for the future of life.**  
19 *Proceedings of the National Academy of Sciences* 2018, **115**:4325-4333.
- 20 5. Sinsheimer RL: **The Santa Cruz Workshop--May 1985.** *Genomics* 1989, **5**:954-956.
- 21 6. DeLisi C: **Santa Fe 1986: Human genome baby-steps.** *Nature* 2008, **455**:876.
- 22 7. Palca J: **Human genome: Department of Energy on the map.** *Nature* 1986, **321**:371.
- 23 8. MacDonald ME, Ambrose CM, Duyao MP, Myers RH, Lin C, Srinidhi L, Barnes G, Taylor SA, James  
24 M, Groot N, et al: **A novel gene containing a trinucleotide repeat that is expanded and**  
25 **unstable on Huntington's disease chromosomes.** *Cell* 1993, **72**:971-983.
- 26 9. Hollstein M, Sidransky D, Vogelstein B, Harris CC: **p53 mutations in human cancers.** *Science*  
27 1991, **253**:49-53.
- 28 10. Dausset J, Cann H, Cohen D, Lathrop M, Lalouel J-M, White R: **Centre d'Etude du**  
29 **polymorphisme humain (CEPH): Collaborative genetic mapping of the human genome.**  
30 *Genomics* 1990, **6**:575-577.
- 31 11. International Human Genome Sequencing C, Lander ES, Linton LM, Birren B, Nusbaum C, Zody  
32 MC, Baldwin J, Devon K, Dewar K, Doyle M, et al: **Initial sequencing and analysis of the human**  
33 **genome.** *Nature* 2001, **409**:860.

- 1 12. Venter JC, Adams MD, Myers EW, Li PW, Mural RJ, Sutton GG, Smith HO, Yandell M, Evans CA,  
2 Holt RA, et al: **The Sequence of the Human Genome.** *Science* 2001, **291**:1304-1351.
- 3 13. International Human Genome Sequencing C: **Finishing the euchromatic sequence of the human**  
4 **genome.** *Nature* 2004, **431**:931.
- 5 14. Reardon J, Ankeny RA, Bangham J, W Darling K, Hilgartner S, Jones KM, Shapiro B, Stevens H,  
6 The Genomic Open workshop g: **Bermuda 2.0: reflections from Santa Cruz.** *GigaScience* 2016,  
7 **5**:giw003-giw003.
- 8 15. Treangen TJ, Salzberg SL: **Repetitive DNA and next-generation sequencing: computational**  
9 **challenges and solutions.** *Nat Rev Genet* 2011, **13**:36-46.
- 10 16. Pushkarev D, Neff NF, Quake SR: **Single-molecule sequencing of an individual human genome.**  
11 *Nature Biotechnology* 2009, **27**:847.
- 12 17. Goodwin S, Gurtowski J, Ethe-Sayers S, Deshpande P, Schatz MC, McCombie WR: **Oxford**  
13 **Nanopore sequencing, hybrid error correction, and de novo assembly of a eukaryotic genome.**  
14 *Genome research* 2015.
- 15 18. Koren S, Schatz MC, Walenz BP, Martin J, Howard JT, Ganapathy G, Wang Z, Rasko DA,  
16 McCombie WR, Jarvis ED, Phillippy AM: **Hybrid error correction and de novo assembly of single-**  
17 **molecule sequencing reads.** *Nature Biotechnology* 2012, **30**:693.
- 18 19. Kingsford C, Schatz MC, Pop M: **Assembly complexity of prokaryotic genomes using short**  
19 **reads.** *BMC Bioinformatics* 2010, **11**:21.
- 20 20. Schatz MC, Delcher AL, Salzberg SL: **Assembly of large genomes using second-generation**  
21 **sequencing.** *Genome Res* 2010, **20**:1165-1173.
- 22 21. Kelley DR, Schatz MC, Salzberg SL: **Quake: quality-aware detection and correction of**  
23 **sequencing errors.** *Genome Biol* 2010, **11**:R116.
- 24 22. **A star is born: the updated Human Reference Genome**  
25 [[http://blogs.nature.com/methagora/2013/12/the\\_updated\\_human\\_reference\\_genome.html](http://blogs.nature.com/methagora/2013/12/the_updated_human_reference_genome.html)]
- 26 23. Schneider VA, Graves-Lindsay T, Howe K, Bouk N, Chen HC, Kitts PA, Murphy TD, Pruitt KD,  
27 Thibaud-Nissen F, Albracht D, et al: **Evaluation of GRCh38 and de novo haploid genome**  
28 **assemblies demonstrates the enduring quality of the reference assembly.** *Genome Res* 2017,  
29 **27**:849-864.
- 30 24. Guo Y, Dai Y, Yu H, Zhao S, Samuels DC, Shyr Y: **Improvements and impacts of GRCh38 human**  
31 **reference on high throughput sequencing data analysis.** *Genomics* 2017, **109**:83-90.
- 32 25. Chen R, Butte AJ: **The reference human genome demonstrates high risk of type 1 diabetes and**  
33 **other disorders.** *Pac Symp Biocomput* 2011:231-242.
- 34 26. Levy S, Sutton G, Ng PC, Feuk L, Halpern AL, Walenz BP, Axelrod N, Huang J, Kirkness EF, Denisov  
35 G, et al: **The Diploid Genome Sequence of an Individual Human.** *PLOS Biology* 2007, **5**:e254.
- 36 27. Wheeler DA, Srinivasan M, Egholm M, Shen Y, Chen L, McGuire A, He W, Chen Y-J, Makhijani V,  
37 Roth GT, et al: **The complete genome of an individual by massively parallel DNA sequencing.**  
38 *Nature* 2008, **452**:872.
- 39 28. Enserink M: **Read All About It--The First Female Genome! Or Is It?** *Science* 2008, **320**:1274-  
40 1274.
- 41 29. Wang J, Wang W, Li R, Li Y, Tian G, Goodman L, Fan W, Zhang J, Li J, Zhang J, et al: **The diploid**  
42 **genome sequence of an Asian individual.** *Nature* 2008, **456**:60.
- 43 30. Bentley DR, Balasubramanian S, Swerdlow HP, Smith GP, Milton J, Brown CG, Hall KP, Evers DJ,  
44 Barnes CL, Bignell HR, et al: **Accurate whole human genome sequencing using reversible**  
45 **terminator chemistry.** *Nature* 2008, **456**:53.
- 46 31. Kim J-I, Ju YS, Park H, Kim S, Lee S, Yi J-H, Mudge J, Miller NA, Hong D, Bell CJ, et al: **A highly**  
47 **annotated whole-genome sequence of a Korean individual.** *Nature* 2009, **460**:1011.
- 48 32. **The International HapMap Project.** *Nature* 2003, **426**:789-796.

- 1 33. Frazer KA, Ballinger DG, Cox DR, Hinds DA, Stuve LL, Gibbs RA, Belmont JW, Boudreau A,  
2 Hardenbol P, Leal SM, et al: **A second generation human haplotype map of over 3.1 million**  
3 **SNPs.** *Nature* 2007, **449**:851-861.
- 4 34. Abecasis GR, Altshuler D, Auton A, Brooks LD, Durbin RM, Gibbs RA, Hurles ME, McVean GA: **A**  
5 **map of human genome variation from population-scale sequencing.** *Nature* 2010, **467**:1061-  
6 1073.
- 7 35. Rosenfeld JA, Mason CE, Smith TM: **Limitations of the Human Reference Genome for**  
8 **Personalized Genomics.** *PLOS ONE* 2012, **7**:e40294.
- 9 36. **E pluribus unum.** *Nature Methods* 2010, **7**:331.
- 10 37. Stevenson KR, Coolon JD, Wittkopp PJ: **Sources of bias in measures of allele-specific expression**  
11 **derived from RNA-seq data aligned to a single reference genome.** *BMC Genomics* 2013,  
12 **14**:536-536.
- 13 38. Panousis NI, Gutierrez-Arcelus M, Dermitzakis ET, Lappalainen T: **Allelic mapping bias in RNA-**  
14 **sequencing is not a major confounder in eQTL studies.** *Genome Biol* 2014, **15**:467.
- 15 39. Buchkovich ML, Eklund K, Duan Q, Li Y, Mohlke KL, Furey TS: **Removing reference mapping**  
16 **biases using limited or no genotype data identifies allelic differences in protein binding at**  
17 **disease-associated loci.** *BMC Med Genomics* 2015, **8**:43.
- 18 40. Castel SE, Levy-Moonshine A, Mohammadi P, Banks E, Lappalainen T: **Tools and best practices**  
19 **for data processing in allelic expression analysis.** *Genome Biology* 2015, **16**:195.
- 20 41. Hoffman-Andrews L: **The known unknown: the challenges of genetic variants of uncertain**  
21 **significance in clinical practice.** *Journal of Law and the Biosciences* 2017, **4**:648-657.
- 22 42. Richards S, Aziz N, Bale S, Bick D, Das S, Gastier-Foster J, Grody WW, Hegde M, Lyon E, Spector E,  
23 et al: **Standards and guidelines for the interpretation of sequence variants: a joint consensus**  
24 **recommendation of the American College of Medical Genetics and Genomics and the**  
25 **Association for Molecular Pathology.** *Genetics In Medicine* 2015, **17**:405.
- 26 43. Dewey FE, Chen R, Cordero SP, Ormond KE, Caleshu C, Karczewski KJ, Whirl-Carrillo M, Wheeler  
27 MT, Dudley JT, Byrnes JK, et al: **Phased whole-genome genetic risk in a family quartet using a**  
28 **major allele reference sequence.** *PLoS Genet* 2011, **7**:e1002280.
- 29 44. Ferrarini A, Xumerle L, Griggio F, Garonzi M, Cantaloni C, Centomo C, Vargas SM, Descombes P,  
30 Marquis J, Collino S, et al: **The Use of Non-Variant Sites to Improve the Clinical Assessment of**  
31 **Whole-Genome Sequence Data.** *PLoS One* 2015, **10**:e0132180.
- 32 45. Magi A, D'Aurizio R, Palombo F, Cifola I, Tattini L, Semeraro R, Pippucci T, Giusti B, Romeo G,  
33 Abbate R, Gensini GF: **Characterization and identification of hidden rare variants in the human**  
34 **genome.** *BMC Genomics* 2015, **16**:340.
- 35 46. Barbitoff YA, Bezdovorniykh IV, Polev DE, Serebryakova EA, Glotov AS, Glotov OS, Predeus AV:  
36 **Catching hidden variation: systematic correction of reference minor allele annotation in**  
37 **clinical variant calling.** *Genetics In Medicine* 2017, **20**:360.
- 38 47. Satya RV, Zavaljevski N, Reifman J: **A new strategy to reduce allelic bias in RNA-Seq**  
39 **readmapping.** *Nucleic Acids Res* 2012, **40**:e127.
- 40 48. Yuan S, Qin Z: **Read-mapping using personalized diploid reference genome for RNA sequencing**  
41 **data reduced bias for detecting allele-specific expression.** *IEEE International Conference on*  
42 *Bioinformatics and Biomedicine workshops IEEE International Conference on Bioinformatics and*  
43 *Biomedicine* 2012, **2012**:718-724.
- 44 49. Liu X, MacLeod JN, Liu J: **iMapSplice: Alleviating reference bias through personalized RNA-seq**  
45 **alignment.** *PLOS ONE* 2018, **13**:e0201554.
- 46 50. van de Geijn B, McVicker G, Gilad Y, Pritchard JK: **WASP: allele-specific software for robust**  
47 **molecular quantitative trait locus discovery.** *Nature Methods* 2015, **12**:1061.



- 1 51. Pandey RV, Franssen SU, Futschik A, Schlotterer C: **Allelic imbalance metre (Allim), a new tool**  
2 **for measuring allele-specific gene expression with RNA-seq data.** *Mol Ecol Resour* 2013,  
3 **13:740-745.**
- 4 52. Kahles A, Behr J, Rättsch G: **MMR: a tool for read multi-mapper resolution.** *Bioinformatics* 2016,  
5 **32:770-772.**
- 6 53. Wang J, Huda A, Lunyak VV, Jordan IK: **A Gibbs sampling strategy applied to the mapping of**  
7 **ambiguous short-sequence tags.** *Bioinformatics* 2010, **26:2501-2508.**
- 8 54. Steinberg KM, Schneider VA, Graves-Lindsay TA, Fulton RS, Agarwala R, Huddleston J, Shiryev  
9 SA, Morgulis A, Surti U, Warren WC, et al: **Single haplotype assembly of the human genome**  
10 **from a hydatidiform mole.** *Genome Res* 2014, **24:2066-2076.**
- 11 55. Chaisson MJ, Huddleston J, Dennis MY, Sudmant PH, Malig M, Hormozdiari F, Antonacci F, Surti  
12 U, Sandstrom R, Boitano M, et al: **Resolving the complexity of the human genome using single-**  
13 **molecule sequencing.** *Nature* 2015, **517:608-611.**
- 14 56. **Reference Genome Improvement** [[https://www.genome.wustl.edu/items/reference-genome-](https://www.genome.wustl.edu/items/reference-genome-improvement/)  
15 [improvement/](https://www.genome.wustl.edu/items/reference-genome-improvement/)]
- 16 57. The Computational Pan-Genomics C: **Computational pan-genomics: status, promises and**  
17 **challenges.** *Briefings in Bioinformatics* 2018, **19:118-135.**
- 18 58. Li R, Li Y, Zheng H, Luo R, Zhu H, Li Q, Qian W, Ren Y, Tian G, Li J, et al: **Building the sequence**  
19 **map of the human pan-genome.** *Nat Biotechnol* 2010, **28:57-63.**
- 20 59. Church DM, Schneider VA, Steinberg KM, Schatz MC, Quinlan AR, Chin C-S, Kitts PA, Aken B,  
21 Marth GT, Hoffman MM, et al: **Extending reference assembly models.** *Genome Biology* 2015,  
22 **16:13.**
- 23 60. Paten B, Novak AM, Eizenga JM, Garrison E: **Genome graphs and the evolution of genome**  
24 **inference.** *Genome Research* 2017, **27:665-676.**
- 25 61. Gordon SP, Contreras-Moreira B, Woods DP, Des Marais DL, Burgess D, Shu S, Stritt C, Roulin AC,  
26 Schackwitz W, Tyler L, et al: **Extensive gene content variation in the Brachypodium distachyon**  
27 **pan-genome correlates with population structure.** *Nat Commun* 2017, **8:2184.**
- 28 62. Medini D, Donati C, Tettelin H, Massignani V, Rappuoli R: **The microbial pan-genome.** *Curr Opin*  
29 *Genet Dev* 2005, **15:589-594.**
- 30 63. Garrison E, Sirén J, Novak AM, Hickey G, Eizenga JM, Dawson ET, Jones W, Garg S, Markello C,  
31 Lin MF, et al: **Variation graph toolkit improves read mapping by representing genetic variation**  
32 **in the reference.** *Nature Biotechnology* 2018, **36:875.**
- 33 64. Garrison E: **Graphical pangenomics.** Cambridge University, 2018.
- 34 65. Valenzuela D, Norri T, Välimäki N, Pitkänen E, Mäkinen V: **Towards pan-genome read alignment**  
35 **to improve variation calling.** *BMC Genomics* 2018, **19:87.**
- 36 66. Rand KD, Grytten I, Nederbragt AJ, Størvik GO, Glad IK, Sandve GK: **Coordinates and intervals in**  
37 **graph-based reference genomes.** *BMC Bioinformatics* 2017, **18:263.**
- 38 67. Paten B, Diekhans M, Earl D, John JS, Ma J, Suh B, Haussler D: **Cactus Graphs for Genome**  
39 **Comparisons.** *Journal of Computational Biology* 2011, **18:469-481.**
- 40 68. Sherman RM, Forman J, Antonescu V, Puiu D, Daya M, Rafaels N, Boorgula MP, Chavan S,  
41 Vergara C, Ortega VE, et al: **Assembly of a pan-genome from deep sequencing of 910 humans**  
42 **of African descent.** *Nature Genetics* 2019, **51:30-35.**
- 43 69. Claw KG, Anderson MZ, Begay RL, Tsosie KS, Fox K, Garrison NA, Bader Alyssa C, Bardill J, Bolnick  
44 Deborah A, Brooks J, et al: **A framework for enhancing ethical genomic research with**  
45 **Indigenous communities.** *Nature Communications* 2018, **9:2957.**

46

47
